# Supplementary material
Source: PubMed Central journal article supplement (PMC6029709)
Supplement: NIHMS954133-supplement-Supplemental_Data_File___doc___tif__pdf__etc__.pdf [file NIHMS954133-supplement-Supplemental_Data_File___doc___tif__pdf__etc__.pdf]

## Supplemental Digital Content 1: Study Design Figure

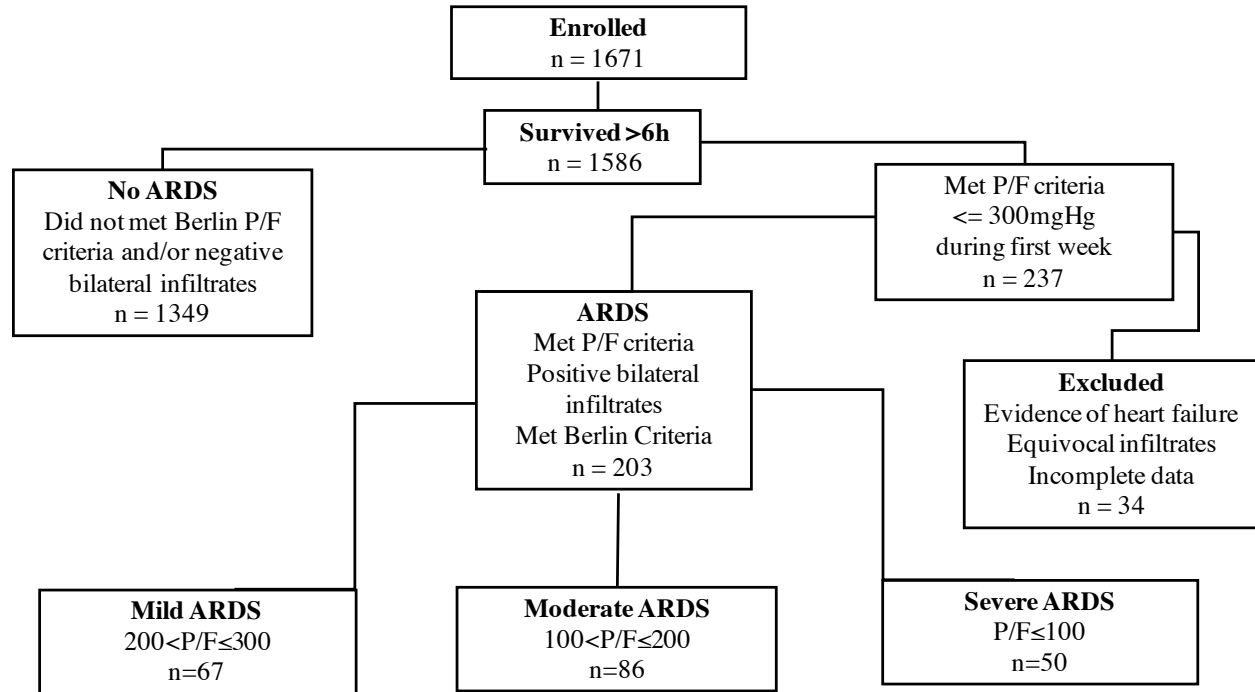

Flowchart of study enrollment. ARDS (Acute Respiratory Distress Syndrome); PaO<sub>2</sub>:FiO<sub>2</sub> ratio (P/F) ratio of  $\leq 300$ mgHg; ARDS severity classified by the degree of hypoxemia: mild ( $200 < P/F \leq 300$ ), moderate ( $100 < P/F \leq 200$ ), and severe ( $P/F \leq 100$ ).

**Supplemental Digital Content 2. All intubated subjects without and with ARDS**

|                                               | <b>No ARDS</b>     | <b>ARDS</b>        | <b>p-value</b>  |
|-----------------------------------------------|--------------------|--------------------|-----------------|
|                                               | <b>n=677 (77%)</b> | <b>n=203 (23%)</b> |                 |
| <b>Age (years)</b>                            | 39 (27-55)         | 41 (27-54)         | 0.24            |
| <b>Male gender (%)</b>                        | 80%                | 83%                | 0.37            |
| <b>BMI (kg/m<sup>2</sup>)</b>                 | 27 +/- 5           | 27 +/- 6           | 0.05            |
| <b>Blunt mechanism (%)</b>                    | 72%                | 84%                | <b>&lt;0.01</b> |
| <b>Uninsured (%)</b>                          | 30%                | 23%                | 0.06            |
| <b>ED GCS</b>                                 | 9 (4-14)           | 8 (3-14)           | 0.07            |
| <b>Admit SBP &lt;90 mmHg (%)</b>              | 11%                | 13%                | 0.35            |
| <b>Admit HR &gt;110 BPM (%)</b>               | 27%                | 44%                | <b>&lt;0.01</b> |
| <b>ISS</b>                                    | 20 (9-29)          | 30 (25-41)         | <b>&lt;0.01</b> |
| <b>Head AIS</b>                               | 3 (0-5)            | 4 (2-5)            | <b>&lt;0.01</b> |
| <b>Chest AIS</b>                              | 0 (0-3)            | 3 (0-4)            | <b>&lt;0.01</b> |
| <b>Any chest injury (AIS&gt;0), n (%)</b>     | 245 (36%)          | 123 (61%)          | <b>&lt;0.01</b> |
| <b>Any severe chest injury (AIS≥3), n (%)</b> | 176 (26%)          | 103 (51%)          | <b>&lt;0.01</b> |
| <b>Any rib fracture(s), n (%)</b>             | 172 (25%)          | 92 (45%)           | <b>&lt;0.01</b> |
| <b>Intubated on admission day, n (%)</b>      | 629 (93%)          | 195 (96%)          | 0.14            |
| <b>Any TBI, n (%)</b>                         | 324 (48%)          | 137 (67%)          | <b>&lt;0.01</b> |
| <b>Admit base excess</b>                      | -4.3 +/- 5.9       | -6.8 +/- 6.2       | <b>&lt;0.01</b> |
| <b>Any transfusion within 6h, n (%)</b>       | 296 (44%)          | 137 (69%)          | <b>&lt;0.01</b> |
| <b>Any transfusion within 24h, n (%)</b>      | 336 (50%)          | 148 (74%)          | <b>&lt;0.01</b> |

\* Data are mean +/- SD, median (inter-quartile range), or n (%) as indicated. Data for skewed variables reported as median with inter-quartile ranges. Injury Severity Score (ISS); Abbreviated injury score (AIS), traumatic brain injury (TBI)

**Supplemental Digital Content 3:****Hospital Charges & Outcomes for all intubated patients without and with ARDS**

|                                            | <b>No ARDS<br/>n=677 (77%)</b> | <b>ARDS<br/>n=203 (13%)</b>   | <b>p-value</b>  |
|--------------------------------------------|--------------------------------|-------------------------------|-----------------|
| <b>Total hospital charge (\$)</b>          | 175,058<br>(93,892-390,286)    | 450,888<br>(224,901-827,5290) | <b>&lt;0.01</b> |
| <b>Charge per day (\$)</b>                 | 24,298<br>(17,797-34,338)      | 24,446<br>(14,989-34,044)     | 0.16            |
| <b>Standard total hospital charge (\$)</b> | 193,176<br>(72,441-434,646)    | 434,646<br>(21,7323-990027)   | <b>&lt;0.01</b> |
| <b>Ventilator free days</b>                | 25 (10-26)                     | 3 (0-17)                      | <b>&lt;0.01</b> |
| <b>ICU days</b>                            | 3 (2-7)                        | 14 (6-23)                     | <b>&lt;0.01</b> |
| <b>Hospital days</b>                       | 8 (3-18)                       | 18 (9-41)                     | <b>&lt;0.01</b> |
| <b>MOF (%)</b>                             | 6%                             | 41%                           | <b>&lt;0.01</b> |
| <b>Mortality at 28 days (%)</b>            | 19%                            | 33%                           | <b>&lt;0.01</b> |

\* Data are mean +/- SD, median (inter-quartile range), or n (%) as indicated. Data for skewed variables reported as median with inter-quartile ranges. Ventilator free days are counted for the first 28 days of hospitalization. Subjects who expired received 0 ventilator free days. Intensive care unit (ICU); multiple organ failure (MOF).
